# Supplementary material for: Triple collocation validates CONUS-wide evapotranspiration inferred from atmospheric conditions
Source: Copernicus journal article supplement (doi:10.5194/egusphere-2025-4225), 2025-09-18
Supplement: Supplementary file 1 [file egusphere-2025-4225-supplement.pdf]

**Supplemental information for “Triple collocation validates CONUS-wide evapotranspiration inferred from atmospheric conditions”**

Erica L. McCormick<sup>1</sup>, Lillian E. Sanders<sup>1</sup>, Kaighin A. McColl<sup>2,3</sup>, Alexandra G. Konings<sup>1</sup>

<sup>1</sup> Department of Earth System Science, Stanford University

<sup>2</sup> Department of Earth and Planetary Sciences, Harvard University

<sup>3</sup> School of Engineering and Applied Sciences, Harvard University

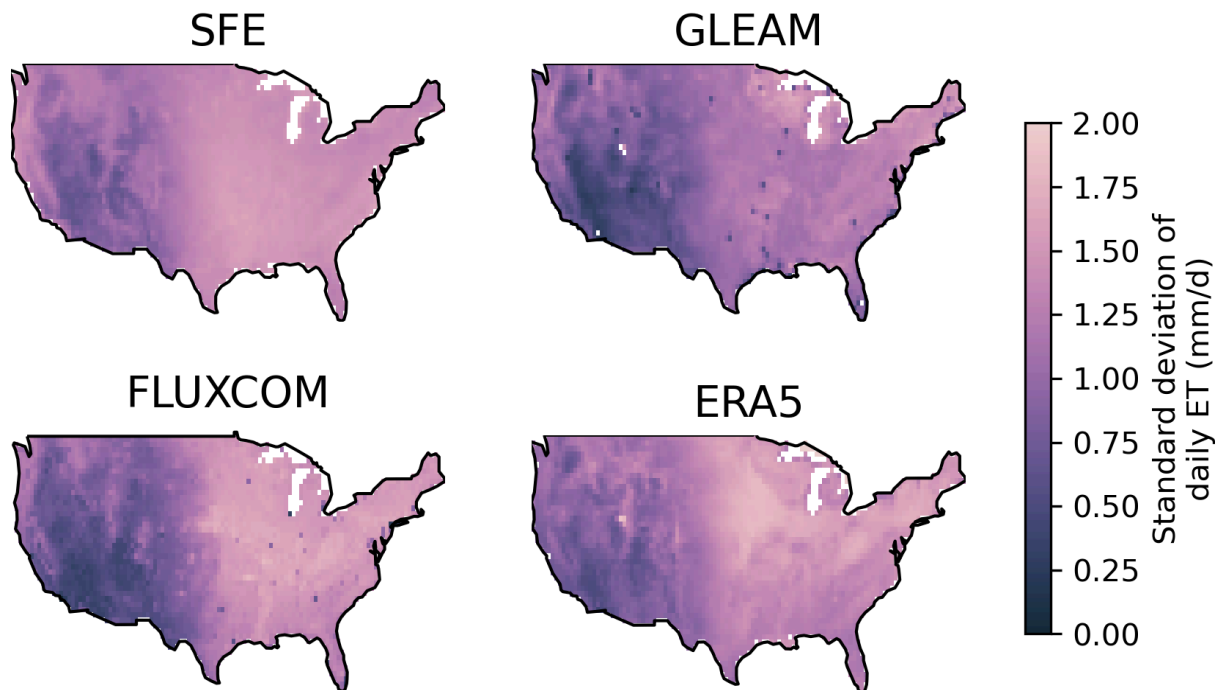

*Figure S1. Standard deviation of daily ET from 1979-2016 for each dataset.*

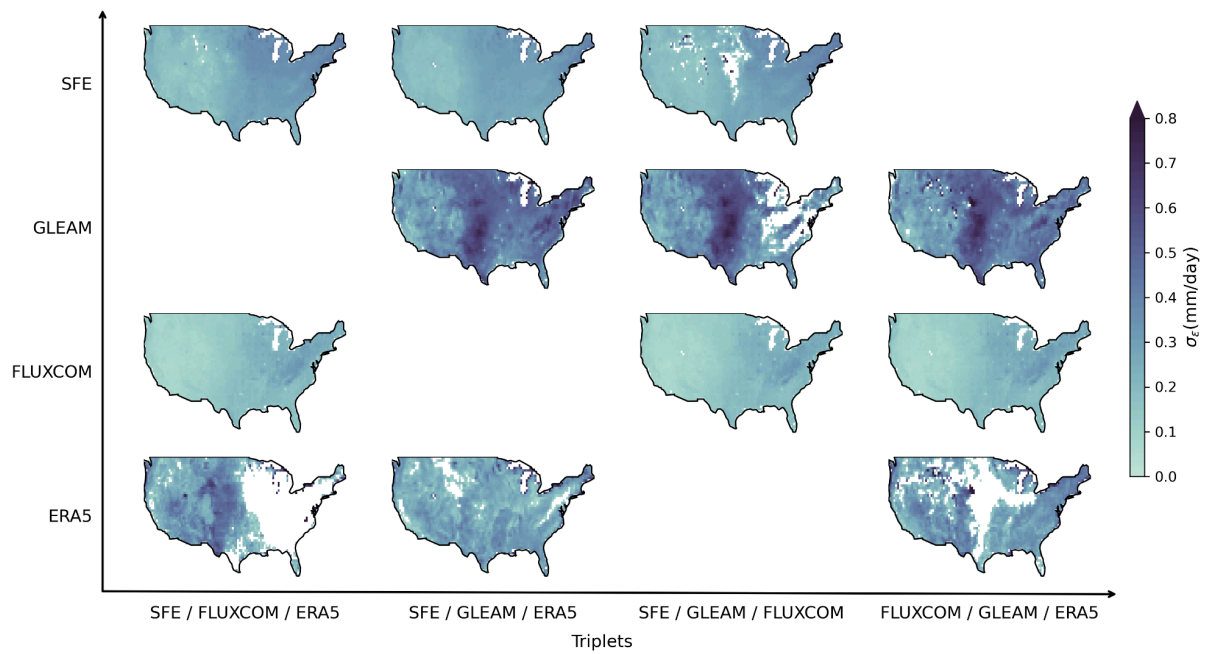

*Figure S2. The random error standard deviation for each triplet (columns) and dataset (rows). White areas are those where the random error standard deviation can not be evaluated because of negative standard deviation, indicating that the assumptions of triple collocation are not met.*

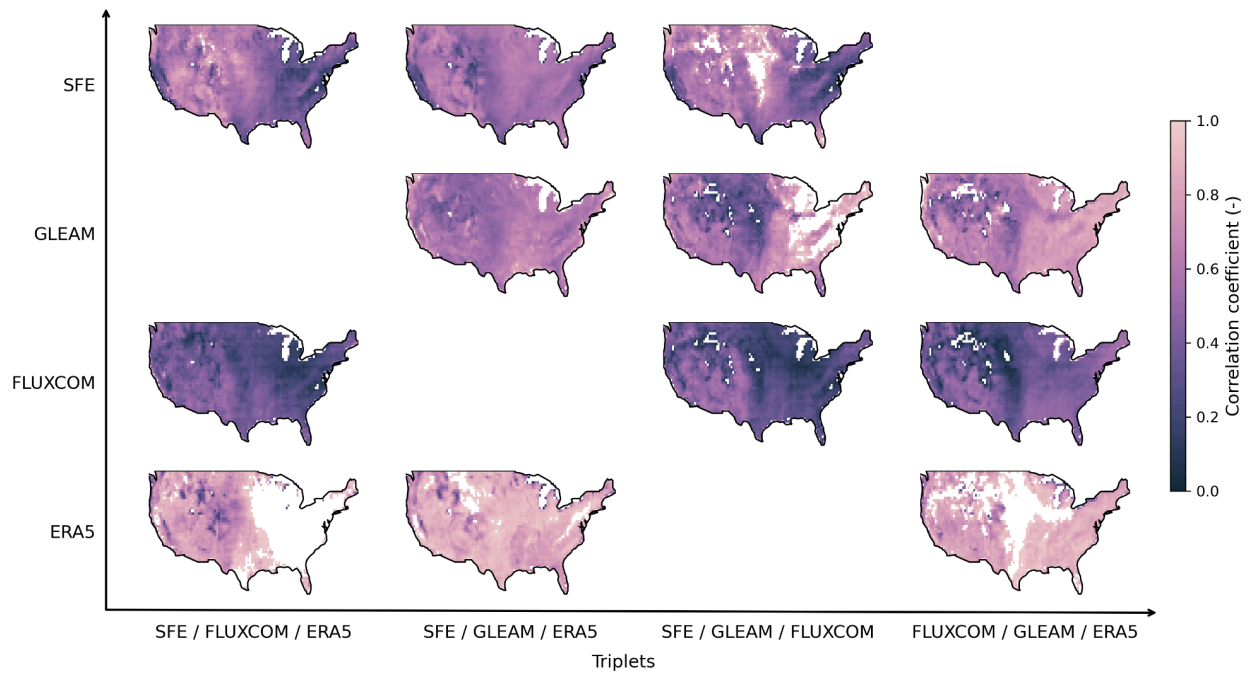

*Figure S3. The correlation coefficient with the truth for each triplet (columns) and dataset (rows). White areas are those where the correlation coefficient is greater than one, indicating that the assumptions of triple collocation are not met.*
